# Supplementary material for: An algorithm and program for finding sequence specific oligo-nucleotide probes for species identification
Source: Springer Nature journal article supplement (doi:10.1186/1471-2105-3-9), 2002-03-06
Supplement: 12859_2001_19_MOESM2_ESM.pdf [file 12859_2001_19_MOESM2_ESM.pdf]

GCATGACGCTGACGTACGAT

| | | | | | | | \* \* \* \* \* \* \* \* \* \* \* \* \* \* \* \* \* \* \* \* \* \*

CGTACTGCGGACTGCATGCTA

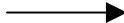

GCATGACGC-TGACGTACGAT

| | | | | | | | | | | | | | | | | | | | | | | | | | | | |

CGTACTGCG ACTGCATGCTA

G
